# Supplementary material for: The high-yield direct synthesis of dimethyl ether from CO2 and H2 in a dry reaction environment
Source: Royal Society of Chemistry journal article supplement (doi:10.1039/d0ta10417e), 2020-11-09
Supplement: d0ta10417e1.pdf [file d0ta10417e1.pdf]

Support Information for

**High Yield Direct Synthesis of Dimethyl Ether from CO<sub>2</sub> and H<sub>2</sub> in Dry Reaction Environment**

Huazheng Li <sup>a</sup>, Shoujie Ren <sup>a,b</sup>, Shenxiang Zhang <sup>a</sup>, Surya Padinjarekutt <sup>a</sup>, Bratin Sengupta <sup>a</sup>, Xinhua Liang <sup>b</sup>, Shiguang Li <sup>c</sup>, Miao Yu<sup>\*a</sup>

<sup>a</sup> Department of Chemical & Biological Engineering, Institution Rensselaer Polytechnic Institute, 110 8Th Street, Troy, NY 12180, USA

<sup>b</sup> Department of Chemical & Biochemical Engineering, Missouri University of Science and Technology, 1101 N. State Street, Rolla, MO 65409, USA

<sup>c</sup> Gas Technology Institute, S Mount Prospect Road, Des Plaines, IL 60018, USA

\* Corresponding author; Email: [yum5@rpi.edu](mailto:yum5@rpi.edu)

## Experimental

### Membrane synthesis and Catalysts preparation

WCM was prepared following the procedure previously reported.<sup>1</sup> Typically, the ceramic hollow fibers were dip-coated in 1 wt.% seeds solution with seed size of 50-250 nm, and then dried and thermally annealed at 200 °C overnight. Membrane growth was conducted at 80 °C for 5 h in the gel with molar composition of 1Al<sub>2</sub>O<sub>3</sub>: 5SiO<sub>2</sub>: 50 Na<sub>2</sub>O: 1000 H<sub>2</sub>O, prepared by mixing sodium aluminate (NaAlO<sub>2</sub>, Al<sub>2</sub>O<sub>3</sub>: 50-56 wt.%, Na<sub>2</sub>O: 37-45 wt.%, Sigma-Aldrich), Ludox colloidal (40 wt.% in water, Sigma-Aldrich), sodium hydroxide (NaOH, 98 wt.%, Sigma-Aldrich) and DI water. After the hydrothermal synthesis, WCM was washed thoroughly and dried for use in MR.

The Cu/ZnO/Al<sub>2</sub>O<sub>3</sub> catalyst with an atomic ratio of 6:3:1 was prepared following the procedure previously reported.<sup>2</sup> A mixed aqueous nitrate solution (total metal concentration of 0.2 M, 500 mL) of Cu(NO<sub>3</sub>)<sub>2</sub> · 3H<sub>2</sub>O, Zn(NO<sub>3</sub>)<sub>2</sub> · 6H<sub>2</sub>O, and Al(NO<sub>3</sub>)<sub>3</sub> · 9H<sub>2</sub>O and an aqueous solution (0.2 M) of Na<sub>2</sub>CO<sub>3</sub> were simultaneously added dropwise into 400 mL of preheated DI water (65-70 °C) under vigorous stirring at 400 rpm. During the co-precipitation process, the precipitating solution was maintained at 65-70 °C and at pH of 6.5-7.0. At the end of co-precipitation, the pH of precipitating solution was immediately adjusted to 7.0 by 0.2 M Na<sub>2</sub>CO<sub>3</sub>. The precipitates were then aged for 30 min at 70 °C under vigorous stirring (400 rpm). Thereafter, the precipitates were filtered under vacuum and rinsed several times with DI water. The resulting catalyst was dried at 110 °C overnight and further calcined in air at 360 °C for 4 h with a heating rate of 2 °C·min<sup>-1</sup>.

HZSM-5 catalyst was prepared by calcining ammonia-ZSM-5 (SiO<sub>2</sub>:Al<sub>2</sub>O<sub>3</sub> = 23:1, surface area of 425 m<sup>2</sup>/g, Alfa Aesar) at 500 °C for 5 h in air with heating rate of 10 °C/min. Bifunctional catalysts with different mass ratios (1:2, 1:1, 4:1, 5:1) were prepared by physically mixing CZA and HZSM-5 powders.

### Characterizations

WCM and catalysts were characterized by SEM, TEM, XRD, BET and ICP-AES before the reaction, and the results were consistent with those previously reported<sup>1,2</sup>. These characterization results, therefore, were not shown here.

The content of coke in spent catalyst was determined by TGA-Q50 (TA Instruments). In order to remove adsorbed water and CO<sub>2</sub> from the catalyst, the sample was heated to 100 °C with a ramping

rate of 10 °C·min<sup>-1</sup> under N<sub>2</sub> flow of 100 sccm and stayed for 60 min. Then, the catalyst was heated to 1,000 °C with the same heating rate and N<sub>2</sub> flow rate to determine the coke amount.

### **DME synthesis in MR**

A homemade packed bed membrane reactor system was used to perform the catalytic testing. ~0.34 g of bifunctional catalysts were loaded in the shell side of the membrane reactor and reduced in situ at 250 °C for 10 h with 20 sccm of H<sub>2</sub> before the test. The catalytic reaction was performed with a pre-mixed gas mixture with H<sub>2</sub>/CO<sub>2</sub> molar ratio of 3:1 at flow rate of 20-28 sccm (GHSV: 3,500-4,700 L·kg<sub>cat</sub><sup>-1</sup>·h<sup>-1</sup>) at reaction temperature of 220-260 °C and pressure of 35 bar. The compositions of the permeate (purged with 250 ml·min<sup>-1</sup> Helium) and retentate (outlet stream of MR, diluted with 10 sccm Helium, splitting method) were analyzed by an on-line gas chromatography (GC7890, Agilent) equipped with TCD and FID detectors. A long-term run over 100 h of time on stream was performed to evaluate the long-term stability. The flow rate of the outlet stream was measured using a bubble flow meter. For bifunctional catalysts with mass ratio of 1/1, 4/1 and 5/1, only MeOH, CO and DME were detected as the products. For bifunctional catalysts with mass ratio of 1/2, a small amount of an unidentified product was formed when reaction temperature was higher than 220 °C.

### **DME synthesis in TR**

The system and procedure for catalytic testing in TR were similar to those of MR, except WCM was replaced by a non-permeable membrane support with the same size as WCM. The non-permeable membrane support was prepared by applying a thin layer of glaze on the outer surface of a ceramic hollow fiber, followed by curing at 1000 °C for 3 h with increasing and decreasing rates of 2 °C·min<sup>-1</sup>. Before being applied in TR, it was tested and confirmed to be non-permeable to any gases.

The CO<sub>2</sub> conversion, product selectivity and yield were calculated as follows:

$$X_{CO_2} = \frac{n_{CO_2-in} - n_{CO_2-out}}{n_{CO_2-in}} \times 100 \quad \% \quad (S1)$$

$$S_{CO} = \frac{n_{CO}}{n_{CO} + n_{MeOH} + 2 * n_{DME}} \times 100\% \quad (S2)$$

$$S_{MeOH} = \frac{n_{MeOH}}{n_{CO} + n_{MeOH} + 2 * n_{DME}} \times 100\% \quad (S3)$$

$$S_{DME} = \frac{2 * n_{DME}}{n_{CO} + n_{MeOH} + 2 * n_{DME}} \times 100\% \quad (S4)$$

$$Y_{CO} = \frac{n_{CO}}{n_{CO2-in}} \times 100\% \quad (S5)$$

$$Y_{MeOH} = \frac{n_{MeOH}}{n_{CO2-in}} \times 100\% \quad (S6)$$

$$Y_{DME} = \frac{2 * n_{DME}}{n_{CO2-in}} \times 100\% \quad (S7)$$

where,  $n_{CO2}$ ,  $n_{CO}$ ,  $n_{MeOH}$  and  $n_{DME}$  is mole of CO<sub>2</sub>, CO, MeOH and DME, respectively.

For  $n_{CO2-in}$  represents the mole of feed-in CO<sub>2</sub>, and  $n_{CO2-out}$  represents the mole of outlet CO<sub>2</sub>. For the mole of outlet CO<sub>2</sub> and other components, it is calculated as follows:

$$n_i = n_{p,i} + n_{o,i} \quad (S8)$$

where,  $n_{p,i}$  and  $n_{o,i}$  is the mole of component  $i$  in the permeate side and outlet stream, respectively. In other words, for MR, mole of component  $i$  both in the permeate side and outlet stream was used. For TR, only mole of component  $i$  in the outlet stream was used due to that of in the permeate side was zero.

## Results and Discussions

**Table S1.** Comparisons of catalytic CO<sub>2</sub> conversion and DME yields between the results in this study and those reported in literatures.

| Number | Temperature and Pressure, °C/bar | CO <sub>2</sub> conversion, % | DME yield, % | Catalysts                                           | Reactor | References |
|--------|----------------------------------|-------------------------------|--------------|-----------------------------------------------------|---------|------------|
| 1      | 250 & 50                         | 29                            | 18.0         | CZZ/FER                                             | TR      | 3          |
| 2      | 260 & 50                         | 26                            | 14.5         | CZZ/FER                                             | TR      | 4          |
| 3      | 260 & 30                         | 24.5                          | 12.6         | CZZ/FER                                             | TR      | 5          |
| 4      | 260 & 50                         | 23.6                          | 11.1         | CZZ/FER                                             | TR      | 6          |
| 5      | 260 & 30                         | 21.9                          | 8.3          | CZZ/FER                                             | TR      | 5          |
| 6      | 250 & 20                         | 17.5                          | 5            | CZZ/FER                                             | TR      | 7          |
| 7      | 260 & 50                         | 29                            | 18.9         | CZA/HZSM-5                                          | TR      | 8          |
| 8      | 240 & 28                         | 26.2                          | 18.3         | CZZA/HZSM-5                                         | TR      | 9          |
| 9      | 260 & 30                         | 24.3                          | 19.6         | CuFeCe/HZSM-5                                       | TR      | 2          |
| 10     | 260 & 30                         | 20.9                          | 13.2         | CuFeCe/HZSM-5                                       | TR      | 10         |
| 11     | 250 & 30                         | 15.6                          | 7.4          | CuTiZr/HZSM-5                                       | TR      | 11         |
| 12     | 240 & 30                         | 23.6                          | 11.1         | CZZ/HZSM-5                                          | TR      | 12         |
| 13     | 250 & 50                         | 23                            | 5.2          | CuZn(Ga)/Al <sub>2</sub> O <sub>3</sub>             | TR      | 13         |
| 14     | 260 & 50                         | 15                            | 4.5          | CZA/Al <sub>2</sub> O <sub>3</sub>                  | TR      | 8          |
| 15     | 270 & 50                         | 9                             | 2.8          | CZ/Al <sub>2</sub> O <sub>3</sub>                   | TR      | 14         |
| 16     | 260 & 20                         | 18.1                          | 4.4          | CZZ/SO <sub>4</sub> <sup>2-</sup> -ZrO <sub>2</sub> | TR      | 15         |
| 17     |                                  | 25.5                          | 11.5         | CZA/H                                               | 1/1     | TR         |
| 18     | 250 & 35                         | 70.0                          | 54.5         | ZSM-5                                               | 4/1     | This study |
| 19     |                                  | 73.4                          | 47.7         |                                                     | 5/1     |            |

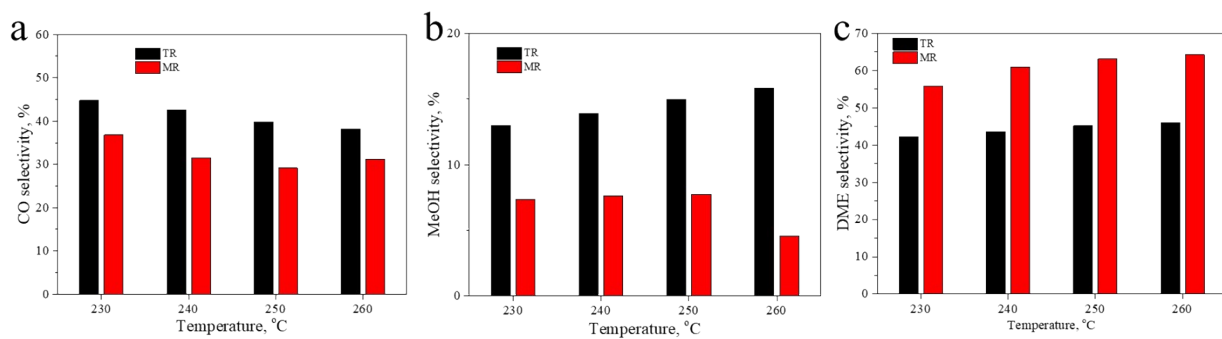

**Figure S1.** Product selectivity of direct DME synthesis from CO<sub>2</sub> and H<sub>2</sub> at different temperatures and 35 bar in TR (black) and MR (red). Membrane length: 45 mm, CZA/HZSM-5=1/1, GHSV= 4,200 L·kg<sub>cat</sub><sup>-1</sup>·h<sup>-1</sup>, results were averaged within the first 4 hours of testing.

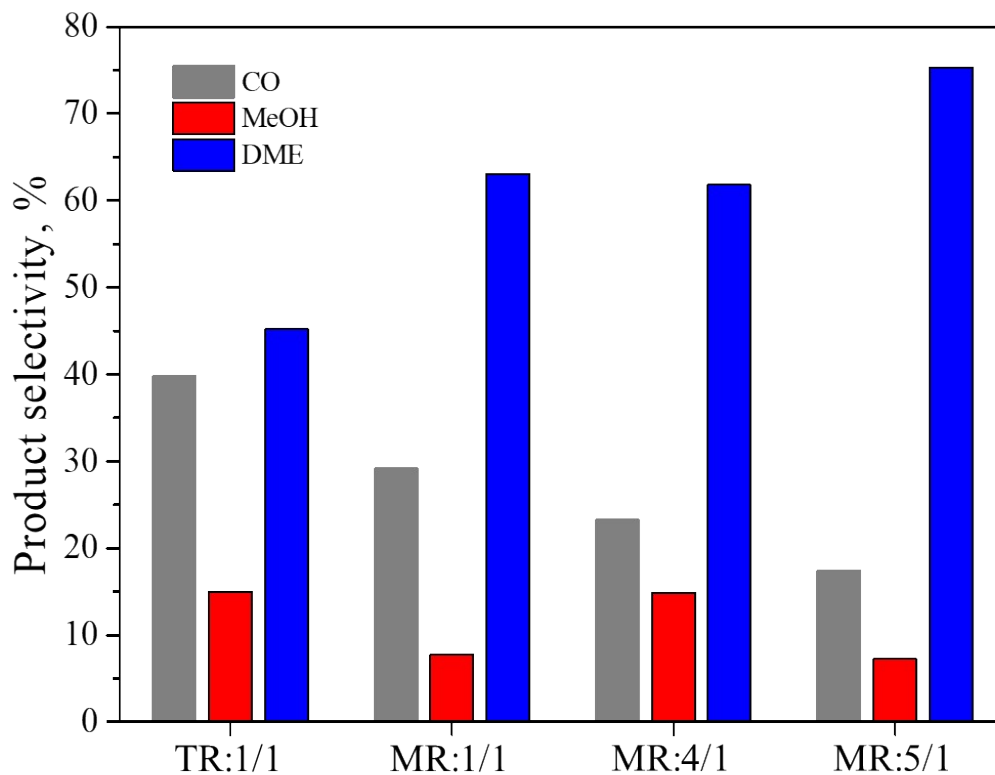

**Figure S2.** Product selectivity of direct DME synthesis from CO<sub>2</sub> and H<sub>2</sub> over different mass ratios of CZA/HZSM-5 at 250 °C and 35 bar in TR and MR. Membrane length: 45 mm, GHSV= 4,200 L·kg<sub>cat</sub><sup>-1</sup>·h<sup>-1</sup>, results were averaged within the first 4 h of testing.

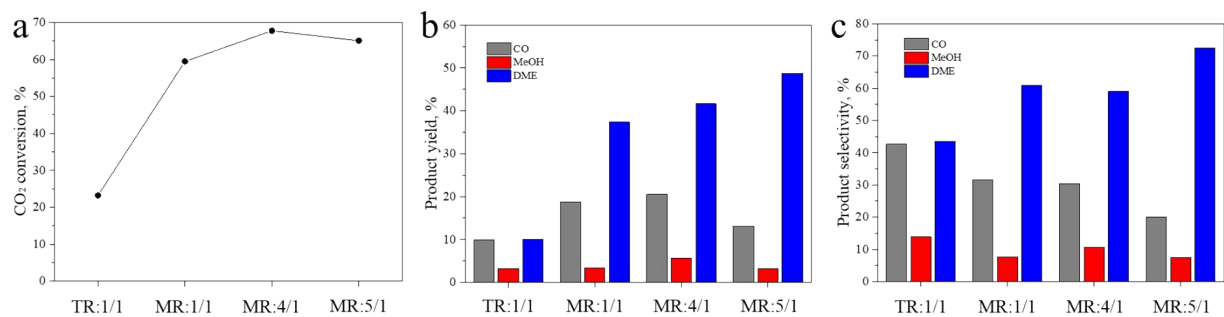

**Figure S3.** Catalytic CO<sub>2</sub> conversion (a), product yield (b) and product selectivity (c) of direct DME synthesis from CO<sub>2</sub> and H<sub>2</sub> over different mass ratios of CZA/HZSM-5 at 240 °C and 35 bar in TR and MR. Membrane length: 45 mm, GHSV= 4,200 L·kg<sub>cat</sub><sup>-1</sup>·h<sup>-1</sup>, results were averaged within the first 4 h of testing.



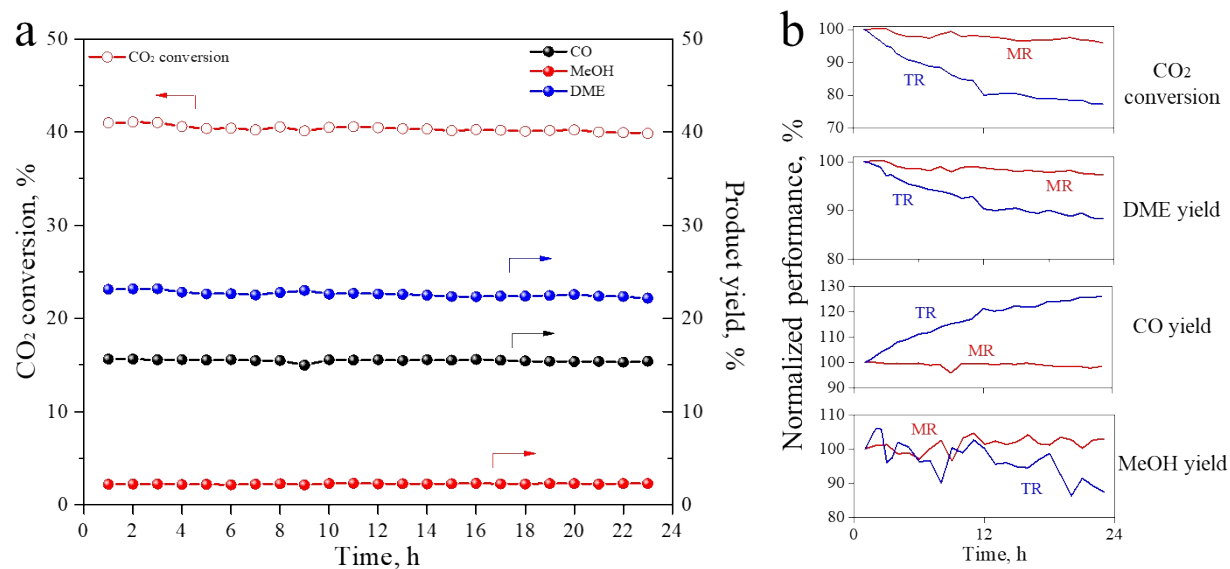

**Figure S4.** Stability of DME synthesis in MR. a) Long-term stability testing on CZA/HZSM-5=1/2 at 220 °C and 35 bar. b) Comparisons of catalytic performance change in MR and TR<sup>2</sup>.

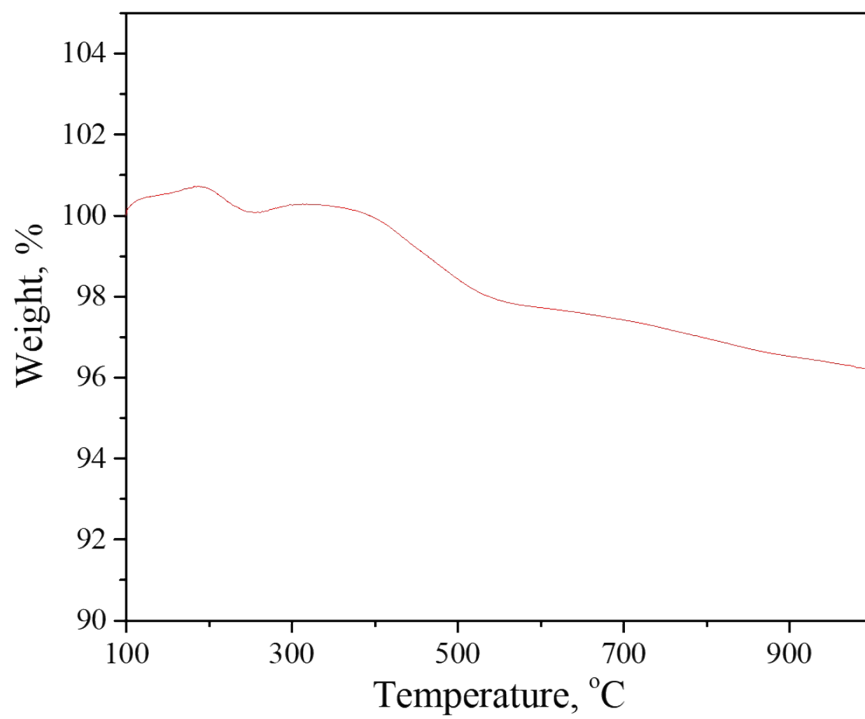

**Figure S5.** TGA of spent bifunctional catalyst with CZA/HZSM-5=5/1 in MR.

## References:

- 1 H. Li, C. Qiu, S. Ren, Q. Dong, S. Zhang, F. Zhou, X. Liang, J. Wang, S. Li and M. Yu, *Science (80-. )*, 2020, **367**, 667 LP – 671.
- 2 S. Ren, X. Fan, Z. Shang, W. R. Shoemaker, L. Ma, T. Wu, S. Li, N. B. Klinghoffer, M. Yu and X. Liang, *J. CO2 Util.*, 2020, **36**, 82–95.
- 3 G. Bonura, F. Frusteri, C. Cannilla, G. Drago Ferrante, A. Aloise, E. Catizzone, M. Migliori and G. Giordano, *Catal. Today*, 2016, **277**, 48–54.
- 4 Q. Sheng, R.-P. Ye, W. Gong, X. Shi, B. Xu, M. Argyle, H. Adidharma and M. Fan, *J. Environ. Sci.*, 2020, **92**, 106–117.
- 5 G. Bonura, M. Migliori, L. Frusteri, C. Cannilla, E. Catizzone, G. Giordano and F. Frusteri, *J. CO2 Util.*, 2018, **24**, 398–406.
- 6 T. Su, X. Zhou, Z. Qin and H. Ji, *ChemPhysChem*, 2017, **18**, 299–309.
- 7 F. Frusteri, M. Migliori, C. Cannilla, L. Frusteri, E. Catizzone, A. Aloise, G. Giordano and G. Bonura, *J. CO2 Util.*, 2017, **18**, 353–361.
- 8 S. P. Naik, T. Ryu, V. Bui, J. D. Miller, N. B. Drinnan and W. Zmierzak, *Chem. Eng. J.*, 2011, **167**, 362–368.
- 9 G. Bonura, C. Cannilla, L. Frusteri, A. Mezzapica and F. Frusteri, *Catal. Today*, 2017, **281**, 337–344.
- 10 X. Zhou, T. Su, Y. Jiang, Z. Qin, H. Ji and Z. Guo, *Chem. Eng. Sci.*, 2016, **153**, 10–20.
- 11 S. Wang, D. Mao, X. Guo, G. Wu and G. Lu, *Catal. Commun.*, 2009, **10**, 1367–1370.
- 12 G. Bonura, M. Cordaro, C. Cannilla, A. Mezzapica, L. Spadaro, F. Arena and F. Frusteri, *Catal. Today*, 2014, **228**, 51–57.
- 13 H. Ham, S. W. Baek, C.-H. Shin and J. W. Bae, *ACS Catal.*, 2019, **9**, 679–690.
- 14 R. J. da Silva, A. F. Pimentel, R. S. Monteiro and C. J. A. Mota, *J. CO2 Util.*, 2016, **15**, 83–88.
- 15 C. Temvutirojn, N. Chuasomboon, T. Numpilai, K. Faungnawakij, M. Chareonpanich, J. Limtrakul and T. Witoon, *Fuel*, 2019, **241**, 695–703.
